# Supplementary material
Source: PubMed Central journal article supplement (PMC548817)

A

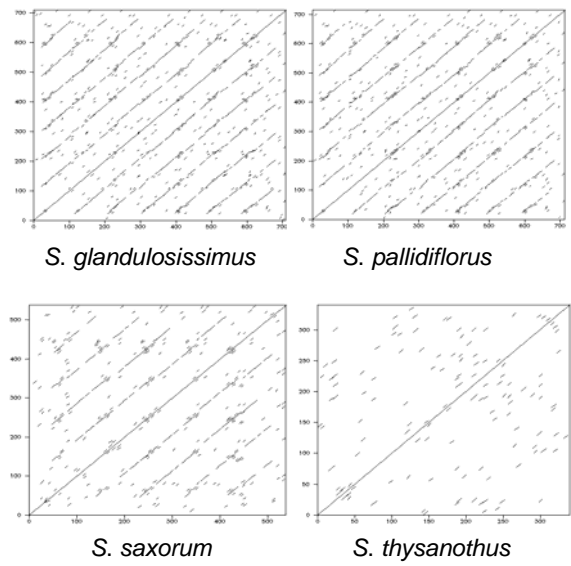

B

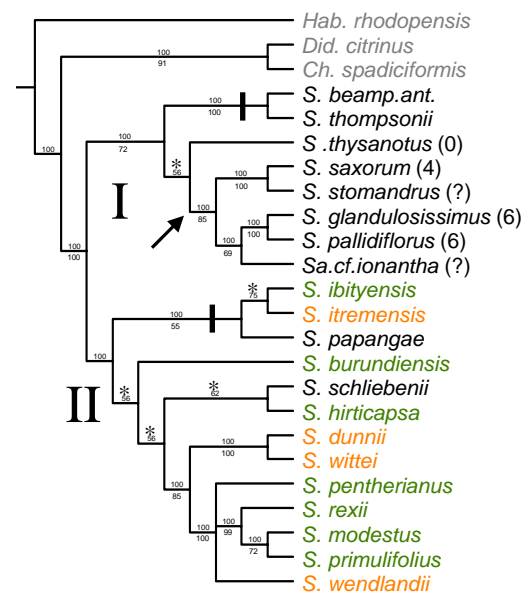

Supplement: plntcell_tpc.104.028936v2_1.pdf [file plntcell_tpc.104.028936v2_1.pdf]
